# Supplementary material for: Зарубежный опыт исследования теневых доходов
Source: MDPI journal article supplement (doi:10.3390/ijms25031587), 2010-01-01
Supplement: s1 [file s1]

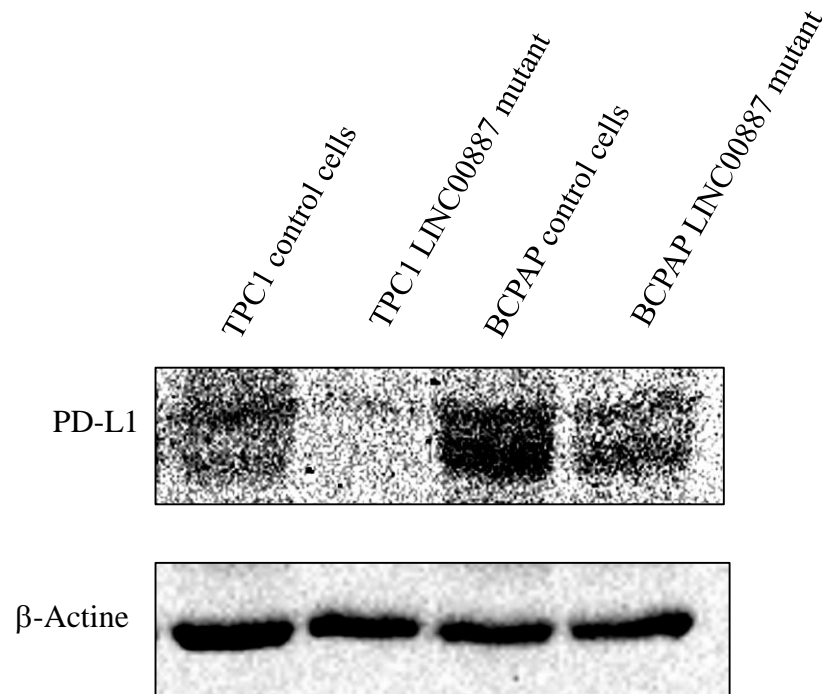

Figure S1. Protein expression of PD-L1 in TPC1 and BCPAP control and LINC0087 mutant cell lines. Western blot assay was used to assess the expression of PD-L1.
