# Supplementary material for: Зарубежный опыт исследования теневых доходов
Source: MDPI journal article supplement (doi:10.3390/ijms25031587), 2010-01-01
Supplement: s1 [file s1]

## *Supplementary Materials*

**Supplementary Table S1.** Primers sequences used in this study.

|                      | Gene                  | Forward Primer                          | Reverse Primer                           |
|----------------------|-----------------------|-----------------------------------------|------------------------------------------|
| Genotyping           | <i>LINC00887</i> _Ex2 | 5' –<br>TGGATTCCTCTCCCAT<br>CTT – 3'    | 5' –<br>GATGGTCCTTCAACTTC<br>TGG – 3'    |
| Isoform<br>detection | <i>LINC00887</i> _Ex3 | 5' –<br>CTGCGAAGGAATGAC<br>AAAGAAC – 3' | 5' –<br>GTCTTAGAGGCAGTGG<br>ATTCTC – 3'  |
|                      | <i>LINC00887</i> _Ex4 | 5' –<br>ACGTTGGAGGAAATC<br>AGTAAGT – 3' | 5' –<br>CTTGGGCTTCTGGAGCT<br>TTA – 3'    |
|                      | <i>LINC00887</i> _Ex5 | 5' –<br>CGTGAGGTTTAGGAG<br>GCTTTAG – 3' | 5' –<br>CCTGGGTGTACTTCCTT<br>CTTTG – 3'  |
|                      | <i>LINC00887</i> _Ex7 | 5' –<br>TTGCCGGAATGGGT<br>AAAT – 3'     | 5' –<br>GCTCAAGTCTCCCTATG<br>AGAAAG – 3' |
|                      |                       | 5' –<br>CTGCGAAGGAATGAC<br>AAAGAAC – 3' | 5' –<br>CTTCGACTGAGGCATC<br>GTT – 3'     |
| qRT-PCR              | <i>LINC00887</i>      | 5' –<br>CTGCGAAGGAATGAC<br>AAAGAAC – 3' | 5' –<br>CTTCGACTGAGGCATC<br>GTT – 3'     |
|                      | <i>GAPDH</i>          | 5' –<br>ACATCATCCCTGCCTC<br>TACG – 3'   | 5' –<br>CCTGCTTCACCACTTC<br>TTG – 3'     |
